# Supplementary material for: Reaction of the hydrogen atom with nitrous oxide in aqueous solution – pulse radiolysis and theoretical study
Source: Royal Society of Chemistry journal article supplement (doi:10.1039/c6ra27793d), 2017-01-01
Supplement: c6ra27793d1.pdf [file c6ra27793d1.pdf]

Supporting information for:

**Reaction of the hydrogen atom with nitrous oxide in aqueous solution - pulse radiolysis  
and theoretical study**

Lukasz Kazmierczak, Dorota Swiatla-Wojcik\*, Marian Wolszczak

Institute of Applied Radiation Chemistry, Faculty of Chemistry,  
Lodz University of Technology, Zeromskiego 116, 90-924 Lodz, Poland

A. Modelling spur chemistry

Table A1. The reaction scheme assumed to simulate evolution of the average radiation spur in N<sub>2</sub>O saturated 0.1 M HCl solution. <sup>a)</sup>

| Reaction |                                                                                                  | Reaction |                                                                                                                     |
|----------|--------------------------------------------------------------------------------------------------|----------|---------------------------------------------------------------------------------------------------------------------|
| (R1)     | $e_{\text{aq}}^- + \text{H}^+ \rightarrow \text{H}^\bullet$                                      | (R9)     | $\bullet\text{OH} + \text{H}_2\text{O}_2 \rightarrow \text{HO}_2^\bullet + \text{H}_2\text{O}$                      |
| (R2)     | $e_{\text{aq}}^- + \bullet\text{OH} \rightarrow \text{OH}^-$                                     | (R10)    | $\text{H}^\bullet + \text{H}_2\text{O}_2 \rightarrow \bullet\text{OH} + \text{H}_2\text{O}$                         |
| (R3)     | $e_{\text{aq}}^- + e_{\text{aq}}^- \xrightarrow{+2\text{H}_2\text{O}} \text{H}_2 + 2\text{OH}^-$ | (R11)    | $\text{H}^+ + \text{OH}^- \rightarrow \text{H}_2\text{O}$                                                           |
| (R4)     | $e_{\text{aq}}^- + \text{H}^\bullet \xrightarrow{+\text{H}_2\text{O}} \text{H}_2 + \text{OH}^-$  | (R12)    | $e_{\text{aq}}^- + \text{N}_2\text{O} \xrightarrow{\text{H}_2\text{O}} \bullet\text{OH} + \text{OH}^- + \text{N}_2$ |
| (R5)     | $e_{\text{aq}}^- + \text{H}_2\text{O}_2 \rightarrow \bullet\text{OH} + \text{OH}^-$              | (R13)    | $\bullet\text{OH} \xrightarrow{+\text{Cl}^-} \text{Cl}_2^{\bullet-}$                                                |
| (R6)     | $\text{H}^\bullet + \bullet\text{OH} \rightarrow \text{H}_2\text{O}$                             | (R14)    | $\text{H}^\bullet + \text{Cl}_2^{\bullet-} \rightarrow \text{H}^+ + 2\text{Cl}^-$                                   |
| (R7)     | $\text{H}^\bullet + \text{H}^\bullet \rightarrow \text{H}_2$                                     | (R15)    | $\text{Cl}_2^{\bullet-} + \text{Cl}_2^{\bullet-} \rightarrow \text{Cl}_2 + 2\text{Cl}^-$                            |
| (R8)     | $\bullet\text{OH} + \bullet\text{OH} \rightarrow \text{H}_2\text{O}_2$                           |          |                                                                                                                     |

<sup>a)</sup> The calculated G-values showed very low sensitivity to the contribution of the reactions:

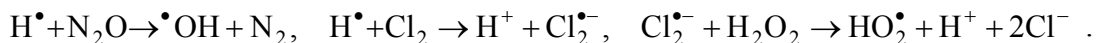

The reactions with the scavengers (N<sub>2</sub>O, H<sup>+</sup>, Cl<sup>-</sup>) homogeneously distributed in the bulk solutions were treated as the first order reactions. The temperature dependencies for  $k_{\text{R1}}-k_{\text{R11}}$  were assumed based on [Elliot A. J., Bartels, D.M., Report AECL-153-127160-450-001, Chalk River Laboratories, Canada 2009]. Details on the temperature dependence for the reaction rate constants  $k_{\text{R12}}-k_{\text{R15}}$  are given in the text and in Table 2.

*Spur parameters.* According to the extended diffusion-kinetic model [Swiatla-Wojcik D., Buxton G.V. (2000) Phys. Chem. Chem. Phys. 2 (2000) 5113] the average radiation spur initially contains:  $e_{aq}^-$ ,  $H^\bullet$ ,  $\bullet OH$ ,  $H_2$ ,  $H_2O_2$ ,  $H_3O^+$ ,  $OH^-$ . The initial distribution of  $e_{aq}^-$  and the products of the dissociative attachment of sub-excitation electrons ( $e_{sub}^-$ ),  $e_{sub}^- + H_2O \rightarrow \bullet OH + H^- \xrightarrow{+H_2O} \bullet OH + H_2 + OH^-$ , were described by the Gaussian function with the standard deviation of 3.8 nm, whereas the distribution of the other species by the Gaussian with the standard deviation of 1.13 nm. The average energy deposited per spur was 83 eV. The initial yields of  $H^\bullet$ ,  $\bullet OH$ ,  $H_2O_2$ ,  $H_3O^+$  and  $OH^-$  were defined by four independent parameters presented in Table A2:  $G^o_{ex}$  - the initial yield of excitations,  $G^o(e_{aq}^-)$  - the initial yield of  $e_{aq}^-$ ,  $G^o_1(H_2)$  - the initial yield of  $H_2$  formed in the dissociative attachment of  $e_{sub}^-$ , and  $G^o_2(H_2)$  - the initial yield of  $H_2$  resulting from the dissociative decay of  $H_2O^*$ ,

Table A2. The initial yields  $G^o$  in  $10^{-7}$  mol  $J^{-1}$  assumed to simulate evolution of the average radiation spur in  $N_2O$  saturated 0.1 M HCl solution. <sup>a)</sup>

| Parameter       | Value | Process                                                                               |
|-----------------|-------|---------------------------------------------------------------------------------------|
| $G^o_{ex}$      | 0.78  | $H_2O \xrightarrow{h\nu} H_2O^*$                                                      |
| $G^o(e_{aq}^-)$ | 4.35  | $e^- \xrightarrow{H_2O} e_{aq}^-$                                                     |
| $G^o_1(H_2)$    | 0.26  | Dissociative attachment of dry electrons                                              |
| $G^o_2(H_2)$    | 0.05  | $H_2O^* \rightarrow H_2 + O^\bullet \xrightarrow{H_2O} H_2 + \bullet OH + \bullet OH$ |

<sup>a)</sup> for more details of the extended diffusion-kinetic model see [Swiatla-Wojcik D., Buxton G.V. Phys. Chem. Chem. Phys. 2 (2000) 5113 ; ibid. 5771; J. Phys. Chem. 99 (1995) 11464].

## B. DFT calculations

Table B1. Geometries and vibrational frequencies of the stationary points of H + N<sub>2</sub>O reaction obtained using UB3LYP/cc-pVTZ for vacuum. <sup>a)</sup>

|                 | H + N <sub>2</sub> O | <i>cis</i> -HNNO | <i>trans</i> -HNNO | OH + N <sub>2</sub>      |
|-----------------|----------------------|------------------|--------------------|--------------------------|
| $r_{\text{NH}}$ | -                    | 1.0341           | 1.0210             | -                        |
| $r_{\text{NN}}$ | 1.1217               | 1.2216           | 1.2393             | 1.0914                   |
| $r_{\text{NO}}$ | 1.1834               | 1.2075           | 1.1985             | -                        |
| $r_{\text{OH}}$ | -                    | -                | -                  | 0.9746                   |
| $H\hat{N}N$     | -                    | 110.6            | 107.9              | -                        |
| $N\hat{N}O$     | 180.0                | 139.6            | 132.5              | -                        |
| $\omega_1$      | 620.8                | 593.7            | 671.2              | 3696.4 (OH)              |
| $\omega_2$      | 620.8                | 760.2            | 776.8              | 2450.0 (N <sub>2</sub> ) |
| $\omega_3$      | 1329.6               | 1222.3           | 1271.3             | -                        |
| $\omega_4$      | 2348.5               | 1338.3           | 1363.6             | -                        |
| $\omega_5$      | -                    | 1731.3           | 1714.1             | -                        |
| $\omega_6$      | -                    | 3234.5           | 3440.9             | -                        |

<sup>a)</sup> Distances ( $r$ ) are in Å, angles in degrees, and frequencies ( $\omega_i$ ) in cm<sup>-1</sup>.

Table B2. Geometries and vibrational frequencies of the transition states of H + N<sub>2</sub>O reaction obtained using UB3LYP/cc-pVTZ for vacuum. <sup>a)</sup>

|                 | [H-NNO]‡       | [H-ONN]‡        | [NNOH]‡         | [ <i>cis/trans</i> -HNNO]‡ |
|-----------------|----------------|-----------------|-----------------|----------------------------|
| $r_{\text{NH}}$ | 1.6404         | -               | 1.2586          | 1.0491                     |
| $r_{\text{NN}}$ | 1.1370         | 1.1311          | 1.2017          | 1.2130                     |
| $r_{\text{NO}}$ | 1.1854         | 1.2235          | 1.4317          | 1.2003                     |
| $r_{\text{OH}}$ | -              | 1.4663          | 1.3783          | -                          |
| $H\hat{N}N$     | 113.8          | -               | 90.2            | 111.2                      |
| $N\hat{N}O$     | 172.2          | 161.0           | 96.5            | 177.3                      |
| $H\hat{O}N$     | -              | 115.5           | 76.7            | -                          |
| $O\hat{H}N$     | -              | -               | 96.6            | -                          |
| $\omega_1$      | 964.6 <i>i</i> | 1330.8 <i>i</i> | 1841.9 <i>i</i> | 858.3 <i>i</i>             |
| $\omega_2$      | 388.5          | 469.8           | 607.0           | 507.7                      |
| $\omega_3$      | 624.1          | 578.3           | 898.3           | 1157.2                     |
| $\omega_4$      | 677.2          | 806.5           | 1011.5          | 1269.4                     |
| $\omega_5$      | 1293.4         | 1199.3          | 1653.1          | 1950.6                     |
| $\omega_6$      | 2228.3         | 2174.8          | 2053.2          | 2899.5                     |

<sup>a)</sup> Distances ( $r$ ) are in Å, angles in degrees, and frequencies ( $\omega_i$ ) in cm<sup>-1</sup>.

Table B3. Geometries and vibrational frequencies of the stationary points of H + N<sub>2</sub>O reaction obtained using UB3LYP/cc-pVTZ using C-PCM water-solvent model. <sup>a)</sup>

|                 | 25°C, $\epsilon = 78.355$ |                  |                    |                          | 70°C, $\epsilon = 63.677$ |                  |                    |                          |
|-----------------|---------------------------|------------------|--------------------|--------------------------|---------------------------|------------------|--------------------|--------------------------|
|                 | H + N <sub>2</sub> O      | <i>cis</i> -HNNO | <i>trans</i> -HNNO | OH + N <sub>2</sub>      | H + N <sub>2</sub> O      | <i>cis</i> -HNNO | <i>trans</i> -HNNO | OH + N <sub>2</sub>      |
| $r_{\text{NH}}$ | -                         | 1.0333           | 1.0216             | -                        | -                         | 1.0333           | 1.0216             | -                        |
| $r_{\text{NN}}$ | 1.1204                    | 1.2194           | 1.2340             | 1.0914                   | 1.1204                    | 1.2194           | 1.2340             | 1.0911                   |
| $r_{\text{NO}}$ | 1.1829                    | 1.2096           | 1.2027             | -                        | 1.1829                    | 1.2095           | 1.2027             | -                        |
| $r_{\text{OH}}$ | -                         | -                | -                  | 0.9754                   | -                         | -                | -                  | 0.9754                   |
| $H\hat{N}N$     | -                         | 111.2            | 108.6              | -                        | -                         | 111.2            | 108.6              | -                        |
| $N\hat{N}O$     | 180.0                     | 139.7            | 132.7              | -                        | 180.0                     | 139.7            | 132.7              | -                        |
| $\omega_1$      | 618.9                     | 594.9            | 674.5              | 3688.6 (OH)              | 618.9                     | 594.9            | 674.5              | 3688.7 (OH)              |
| $\omega_2$      | 618.9                     | 756.5            | 773.5              | 2450.0 (N <sub>2</sub> ) | 618.9                     | 756.5            | 773.5              | 2452.0 (N <sub>2</sub> ) |
| $\omega_3$      | 1325.8                    | 1222.9           | 1250.3             | -                        | 1325.8                    | 1222.9           | 1250.4             | -                        |
| $\omega_4$      | 2334.9                    | 1329.1           | 1369.1             | -                        | 2334.9                    | 1329.1           | 1369.0             | -                        |
| $\omega_5$      | -                         | 1708.2           | 1693.8             | -                        | -                         | 1708.3           | 1693.9             | -                        |
| $\omega_6$      | -                         | 3256.7           | 3444.4             | -                        | -                         | 3256.7           | 3444.4             | -                        |

<sup>a)</sup> Distances ( $r$ ) are in Å, angles in degrees, and frequencies ( $\omega_i$ ) in cm<sup>-1</sup>.

Table B4. Geometries and vibrational frequencies of the transition states of H + N<sub>2</sub>O reaction obtained using UB3LYP/cc-pVTZ using C-PCM water-solvent model. <sup>a)</sup>

|                 | 25°C, $\epsilon = 78.355$ |                 |                 |                            | 70°C, $\epsilon = 63.677$ |                 |                 |                            |
|-----------------|---------------------------|-----------------|-----------------|----------------------------|---------------------------|-----------------|-----------------|----------------------------|
|                 | [H-NNO]‡                  | [H-ONN]‡        | [NNOH]‡         | [ <i>cis/trans</i> -HNNO]‡ | [H-NNO]‡                  | [H-ONN]‡        | [NNOH]‡         | [ <i>cis/trans</i> -HNNO]‡ |
| $r_{\text{NH}}$ | 1.6330                    | -               | 1.2576          | 1.0453                     | 1.6330                    | -               | 1.2576          | 1.0453                     |
| $r_{\text{NN}}$ | 1.1359                    | 1.1301          | 1.1994          | 1.2120                     | 1.1359                    | 1.1301          | 1.1994          | 1.2120                     |
| $r_{\text{NO}}$ | 1.1851                    | 1.2230          | 1.4381          | 1.2031                     | 1.1851                    | 1.2230          | 1.4381          | 1.2031                     |
| $r_{\text{OH}}$ | -                         | 1.4574          | 1.3818          | -                          | -                         | 1.4575          | 1.3818          | -                          |
| $H\hat{N}N$     | 113.7                     | -               | 90.6            | 111.4                      | 113.7                     | -               | 90.6            | 111.4                      |
| $N\hat{N}O$     | 172.2                     | 161.0           | 96.3            | 177.5                      | 172.2                     | 161.0           | 96.3            | 177.5                      |
| $H\hat{O}N$     | -                         | 115.6           | 76.6            | -                          | -                         | 115.6           | 76.6            | -                          |
| $O\hat{H}N$     | -                         | -               | 96.5            | -                          | -                         | -               | 96.5            | -                          |
| $\omega_1$      | 983.7 <i>i</i>            | 1412.2 <i>i</i> | 1845.0 <i>i</i> | 863.9 <i>i</i>             | 983.7 <i>i</i>            | 1411.9 <i>i</i> | 1845.0 <i>i</i> | 863.9 <i>i</i>             |
| $\omega_2$      | 392.3                     | 479.7           | 579.9           | 497.4                      | 392.3                     | 479.7           | 580.0           | 497.5                      |
| $\omega_3$      | 622.9                     | 578.7           | 891.4           | 1164.2                     | 622.9                     | 578.7           | 891.5           | 1164.2                     |
| $\omega_4$      | 679.5                     | 808.5           | 997.3           | 1260.1                     | 679.5                     | 808.5           | 997.4           | 1260.1                     |
| $\omega_5$      | 1286.7                    | 1193.9          | 1664.2          | 1927.8                     | 1286.7                    | 1193.9          | 1664.2          | 1927.9                     |
| $\omega_6$      | 2212.2                    | 2159.9          | 2047.8          | 2984.4                     | 2212.3                    | 2159.9          | 2047.8          | 2984.2                     |

<sup>a)</sup> Distances ( $r$ ) are in Å, angles in degrees, and frequencies ( $\omega_i$ ) in cm<sup>-1</sup>.

Table B5. Geometries and vibrational frequencies of the stationary points of H + N<sub>2</sub>O reaction obtained using UB3LYP/cc-pVTZ using IEF-PCM water-solvent model. <sup>a)</sup>

|                 | 25°C, $\epsilon = 78.355$ |                  |                    |                          | 70°C, $\epsilon = 63.677$ |                  |                    |                          |
|-----------------|---------------------------|------------------|--------------------|--------------------------|---------------------------|------------------|--------------------|--------------------------|
|                 | H + N <sub>2</sub> O      | <i>cis</i> -HNNO | <i>trans</i> -HNNO | OH + N <sub>2</sub>      | H + N <sub>2</sub> O      | <i>cis</i> -HNNO | <i>trans</i> -HNNO | OH + N <sub>2</sub>      |
| $r_{\text{NH}}$ | -                         | 1.0333           | 1.0216             | -                        | -                         | 1.0333           | 1.0216             | -                        |
| $r_{\text{NN}}$ | 1.1204                    | 1.2194           | 1.2340             | 1.0911                   | 1.1204                    | 1.2194           | 1.2341             | 1.0911                   |
| $r_{\text{NO}}$ | 1.1829                    | 1.2096           | 1.2027             | -                        | 1.1829                    | 1.2096           | 1.2027             | -                        |
| $r_{\text{OH}}$ | -                         | -                | -                  | 0.9754                   | -                         | -                | -                  | 0.9754                   |
| $H\hat{N}N$     | -                         | 111.2            | 108.6              | -                        | -                         | 111.2            | 108.6              | -                        |
| $N\hat{N}O$     | 180.0                     | 139.7            | 132.7              | -                        | 180.0                     | 139.7            | 132.7              | -                        |
| $\omega_1$      | 618.9                     | 594.5            | 674.6              | 3688.6 (OH)              | 618.9                     | 594.4            | 674.6              | 3688.7 (OH)              |
| $\omega_2$      | 618.9                     | 756.2            | 773.5              | 2452.0 (N <sub>2</sub> ) | 618.9                     | 756.2            | 773.6              | 2452.0 (N <sub>2</sub> ) |
| $\omega_3$      | 1325.8                    | 1222.7           | 1250.4             | -                        | 1325.8                    | 1222.6           | 1250.6             | -                        |
| $\omega_4$      | 2334.9                    | 1328.8           | 1369.0             | -                        | 2334.9                    | 1328.7           | 1369.0             | -                        |
| $\omega_5$      | -                         | 1708.4           | 1694.0             | -                        | -                         | 1708.5           | 1694.1             | -                        |
| $\omega_6$      | -                         | 3256.6           | 3444.3             | -                        | -                         | 3256.6           | 3444.3             | -                        |

<sup>a)</sup> Distances ( $r$ ) are in Å, angles in degrees, and frequencies ( $\omega_i$ ) in cm<sup>-1</sup>.

Table B6. Geometries and vibrational frequencies of the transition states of H + N<sub>2</sub>O reaction obtained using UB3LYP/cc-pVTZ using IEF-PCM water-solvent model. <sup>a)</sup>

|                 | 25°C, $\epsilon = 78.355$ |                 |                 |                            | 70°C, $\epsilon = 63.677$ |                 |                 |                            |
|-----------------|---------------------------|-----------------|-----------------|----------------------------|---------------------------|-----------------|-----------------|----------------------------|
|                 | [H-NNO]‡                  | [H-ONN]‡        | [NNOH]‡         | [ <i>cis/trans</i> -HNNO]‡ | [H-NNO]‡                  | [H-ONN]‡        | [NNOH]‡         | [ <i>cis/trans</i> -HNNO]‡ |
| $r_{\text{NH}}$ | 1.6331                    | -               | 1.2576          | 1.0454                     | 1.6331                    | -               | 1.2576          | 1.0454                     |
| $r_{\text{NN}}$ | 1.1359                    | 1.1302          | 1.1994          | 1.2120                     | 1.1359                    | 1.1302          | 1.1995          | 1.2120                     |
| $r_{\text{NO}}$ | 1.1851                    | 1.2230          | 1.4381          | 1.2031                     | 1.1851                    | 1.2230          | 1.4380          | 1.2031                     |
| $r_{\text{OH}}$ | -                         | 1.4575          | 1.3818          | -                          | -                         | 1.4576          | 1.3818          | -                          |
| $H\hat{N}N$     | 113.7                     | -               | 90.6            | 111.4                      | 113.7                     | -               | 90.6            | 111.4                      |
| $N\hat{N}O$     | 172.2                     | 161.0           | 96.3            | 177.5                      | 172.2                     | 161.0           | 96.3            | 177.5                      |
| $H\hat{O}N$     | -                         | 115.6           | 76.6            | -                          | -                         | 115.6           | 76.6            | -                          |
| $O\hat{H}N$     | -                         | -               | 96.5            | -                          | -                         | -               | 96.5            | -                          |
| $\omega_1$      | 983.7 <i>i</i>            | 1411.7 <i>i</i> | 1844.9 <i>i</i> | 863.8 <i>i</i>             | 983.7 <i>i</i>            | 1411.2 <i>i</i> | 1844.9 <i>i</i> | 863.8 <i>i</i>             |
| $\omega_2$      | 392.3                     | 480.0           | 580.0           | 497.5                      | 392.3                     | 480.0           | 580.2           | 497.5                      |
| $\omega_3$      | 622.9                     | 578.7           | 891.5           | 1164.2                     | 622.9                     | 578.7           | 891.5           | 1164.1                     |
| $\omega_4$      | 679.4                     | 808.5           | 997.6           | 1260.1                     | 679.4                     | 808.5           | 997.7           | 1260.2                     |
| $\omega_5$      | 1286.7                    | 1194.0          | 1664.1          | 1928.0                     | 1286.7                    | 1194.0          | 1664.1          | 1928.1                     |
| $\omega_6$      | 2212.2                    | 2159.9          | 2047.8          | 2984.0                     | 2212.3                    | 2160.0          | 2047.9          | 2983.6                     |

<sup>a)</sup> Distances ( $r$ ) are in Å, angles in degrees, and frequencies ( $\omega_i$ ) in cm<sup>-1</sup>.



Table B7. Geometries and vibrational frequencies of the stationary points of H + N<sub>2</sub>O reaction obtained using UB3LYP/cc-pVTZ using SMD water-solvent model. <sup>a)</sup>

|                 | 25°C, $\epsilon = 78.355$ |                  |                    |                          | 70°C, $\epsilon = 63.677$ |                  |                    |                          |
|-----------------|---------------------------|------------------|--------------------|--------------------------|---------------------------|------------------|--------------------|--------------------------|
|                 | H + N <sub>2</sub> O      | <i>cis</i> -HNNO | <i>trans</i> -HNNO | OH + N <sub>2</sub>      | H + N <sub>2</sub> O      | <i>cis</i> -HNNO | <i>trans</i> -HNNO | OH + N <sub>2</sub>      |
| $r_{\text{NH}}$ | -                         | 1.0349           | 1.0236             | -                        | -                         | 1.0349           | 1.0236             | -                        |
| $r_{\text{NN}}$ | 1.1203                    | 1.2187           | 1.2331             | 1.0908                   | 1.1203                    | 1.2187           | 1.2331             | 1.0908                   |
| $r_{\text{NO}}$ | 1.1829                    | 1.2104           | 1.2035             | -                        | 1.1829                    | 1.2104           | 1.2035             | -                        |
| $r_{\text{OH}}$ | -                         | -                | -                  | 0.9783                   | -                         | -                | -                  | 0.9783                   |
| $H\hat{N}N$     | -                         | 111.6            | 108.8              | -                        | -                         | 111.6            | 108.8              | -                        |
| $N\hat{N}O$     | 180.0                     | 139.8            | 132.8              | -                        | 180.0                     | 139.8            | 132.8              | -                        |
| $\omega_1$      | 619.1                     | 598.8            | 675.7              | 3633.0 (OH)              | 619.1                     | 598.4            | 675.7              | 3633.4 (OH)              |
| $\omega_2$      | 619.1                     | 733.3            | 761.8              | 2454.0 (N <sub>2</sub> ) | 619.1                     | 733.1            | 761.8              | 2454.0 (N <sub>2</sub> ) |
| $\omega_3$      | 1326.8                    | 1213.1           | 1246.0             | -                        | 1326.8                    | 1213.0           | 1246.2             | -                        |
| $\omega_4$      | 2339.4                    | 1322.0           | 1372.2             | -                        | 2339.4                    | 1321.9           | 1372.2             | -                        |
| $\omega_5$      | -                         | 1712.7           | 1694.2             | -                        | -                         | 1712.8           | 1694.3             | -                        |
| $\omega_6$      | -                         | 3249.1           | 3429.3             | -                        | -                         | 3249.1           | 3429.3             | -                        |

<sup>a)</sup> Distances ( $r$ ) are in Å, angles in degrees, and frequencies ( $\omega_i$ ) in cm<sup>-1</sup>.

Table B8. Geometries and vibrational frequencies of the transition states of H + N<sub>2</sub>O reaction obtained using UB3LYP/cc-pVTZ using SMD water-solvent model. <sup>a)</sup>

|                 | 25°C, $\epsilon = 78.355$ |                 |                 |                            | 70°C, $\epsilon = 63.677$ |                 |                 |                            |
|-----------------|---------------------------|-----------------|-----------------|----------------------------|---------------------------|-----------------|-----------------|----------------------------|
|                 | [H-NNO]‡                  | [H-ONN]‡        | [NNOH]‡         | [ <i>cis/trans</i> -HNNO]‡ | [H-NNO]‡                  | [H-ONN]‡        | [NNOH]‡         | [ <i>cis/trans</i> -HNNO]‡ |
| $r_{\text{NH}}$ | 1.6449                    | -               | 1.2649          | 1.0454                     | 1.6449                    | -               | 1.2648          | 1.0454                     |
| $r_{\text{NN}}$ | 1.1355                    | 1.1300          | 1.1987          | 1.2126                     | 1.1355                    | 1.1300          | 1.1988          | 1.2126                     |
| $r_{\text{NO}}$ | 1.1860                    | 1.2222          | 1.4370          | 1.2038                     | 1.1860                    | 1.2222          | 1.4369          | 1.2038                     |
| $r_{\text{OH}}$ | -                         | 1.4661          | 1.3850          | -                          | -                         | 1.4661          | 1.3850          | -                          |
| $H\hat{N}N$     | 113.2                     | -               | 90.7            | 111.4                      | 113.2                     | -               | 90.7            | 111.4                      |
| $N\hat{N}O$     | 172.0                     | 161.0           | 96.4            | 177.7                      | 172.0                     | 161.0           | 96.4            | 177.7                      |
| $H\hat{O}N$     | -                         | 115.1           | 76.8            | -                          | -                         | 115.1           | 76.8            | -                          |
| $O\hat{H}N$     | -                         | -               | 96.1            | -                          | -                         | -               | 96.1            | -                          |
| $\omega_1$      | 985.6 <i>i</i>            | 1413.0 <i>i</i> | 1858.2 <i>i</i> | 868.8 <i>i</i>             | 985.6 <i>i</i>            | 1412.4 <i>i</i> | 1858.1 <i>i</i> | 868.8 <i>i</i>             |
| $\omega_2$      | 391.0                     | 474.1           | 583.9           | 500.2                      | 390.9                     | 474.2           | 584.0           | 500.3                      |
| $\omega_3$      | 621.0                     | 579.7           | 889.9           | 1166.0                     | 621.0                     | 579.7           | 890.0           | 1166.0                     |
| $\omega_4$      | 681.0                     | 809.8           | 971.7           | 1266.5                     | 680.9                     | 809.9           | 971.9           | 1266.5                     |
| $\omega_5$      | 1285.3                    | 1197.9          | 1665.9          | 1928.4                     | 1285.3                    | 1198.0          | 1665.8          | 1928.5                     |
| $\omega_6$      | 2216.0                    | 2162.1          | 2013.1          | 3007.7                     | 2216.1                    | 2162.2          | 2013.4          | 3007.2                     |

<sup>a)</sup> Distances ( $r$ ) are in Å, angles in degrees, and frequencies ( $\omega_i$ ) in cm<sup>-1</sup>.
